# Supplementary material for: Nrf2 Downregulation Contributes to Epithelial-to-Mesenchymal Transition in Helicobacter pylori-Infected Cells
Source: MDPI journal article supplement (doi:10.3390/cancers14174316), 2022-09-02
Supplement: s1 [file s1]

## Supplementary Materials and Results

### SUPPLEMENTARY FIGURES

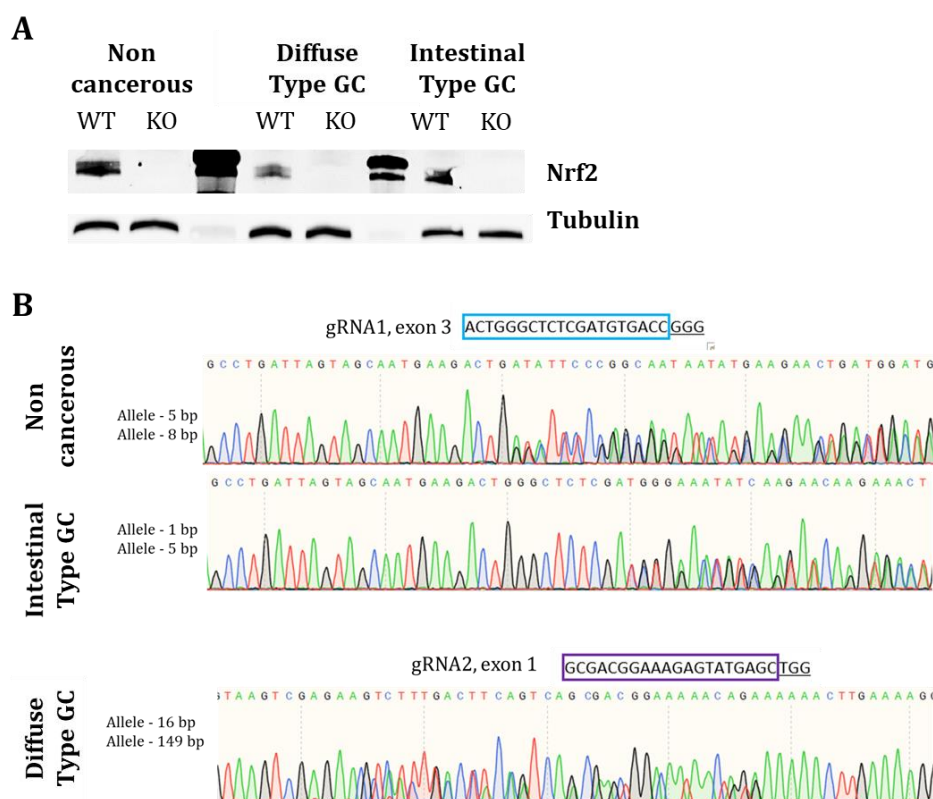

**Figure S1. Verification of Nrf2 invalidation by CRISPR-cas9 in the three gastric cell lines. (A)** The invalidation of Nrf2 was assessed by western-blotting. **(B)** The invalidation of Nrf2 was assessed by sequencing.

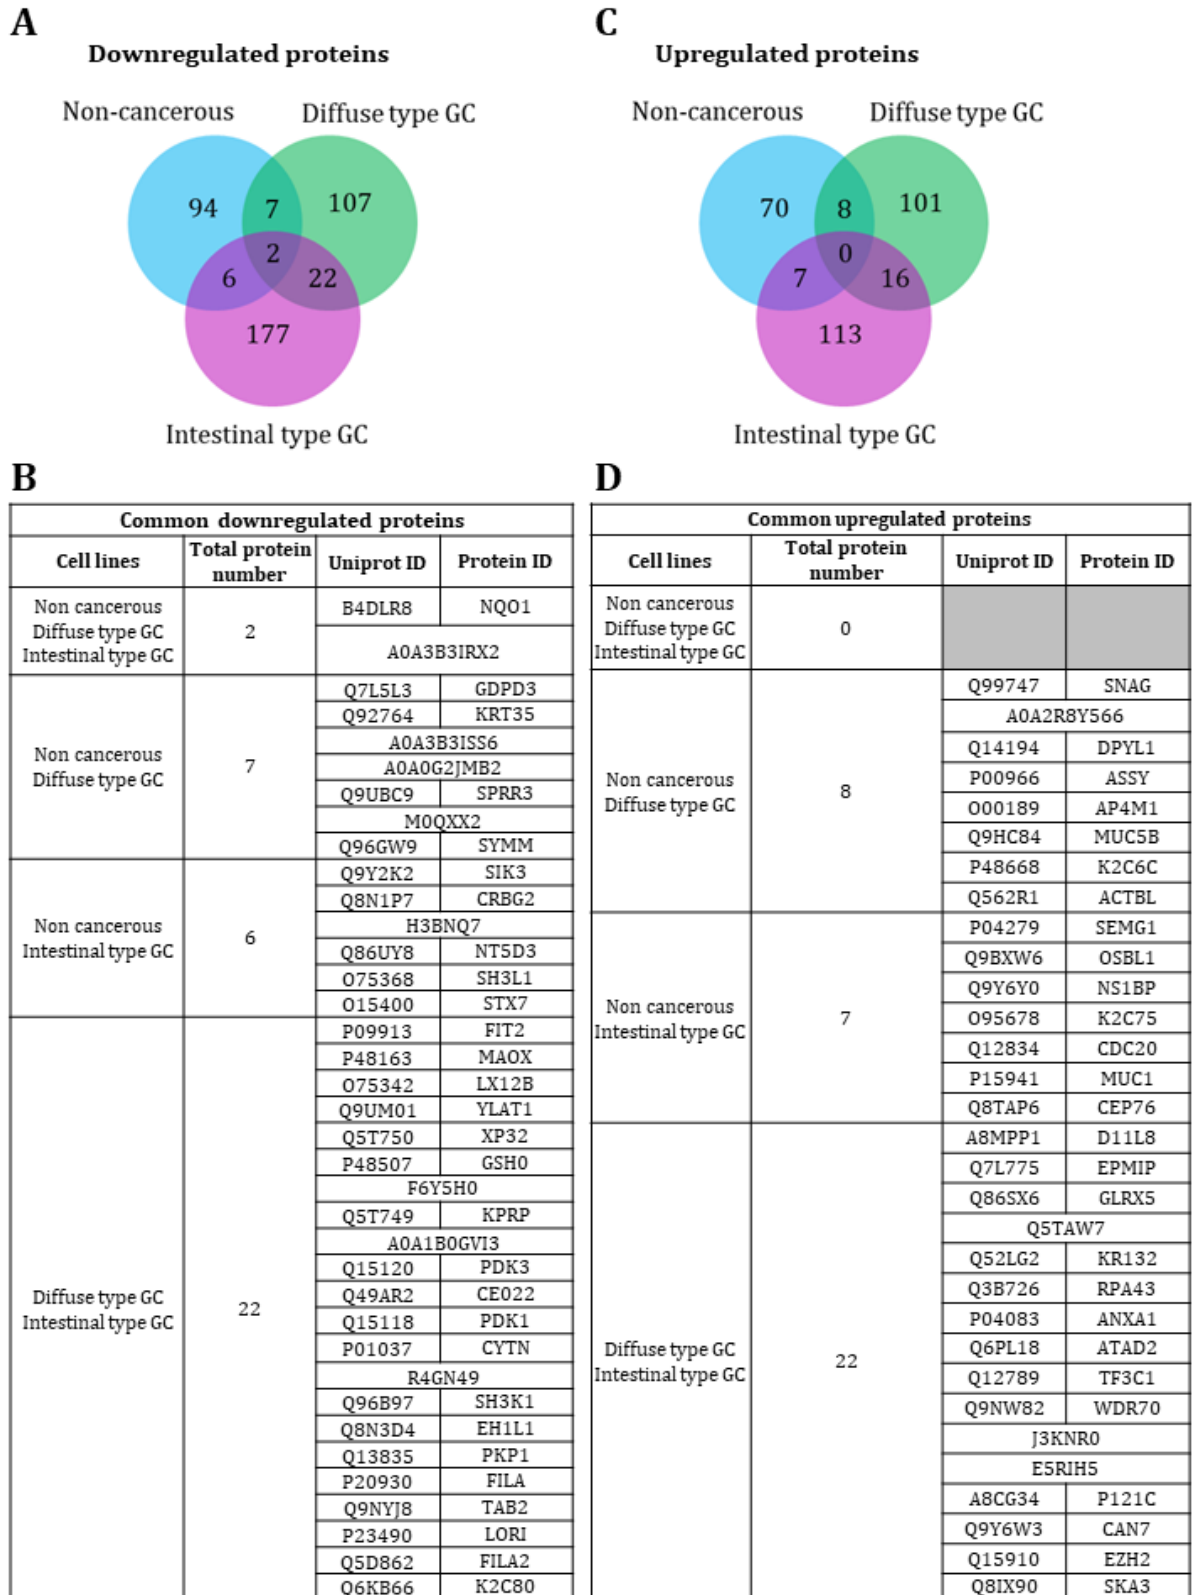

**Figure S2. Common regulated proteins in the three Nrf2-KO vs WT gastric cell lines.** (A) Venn diagram representing overlaps among the differentially down-regulated (p-value <0.05; abundance ratio <0.65) identified in the three different Nrf2-KO cell lines. (B) List of the common down-regulated proteins between the three cell lines. (C) Venn diagram representing overlaps among the differentially up-regulated (p-value <0.05; abundance ratio >1.5) identified in the three different Nrf2-KO cell lines. (D) List of the common up-regulated proteins between the three cell lines.

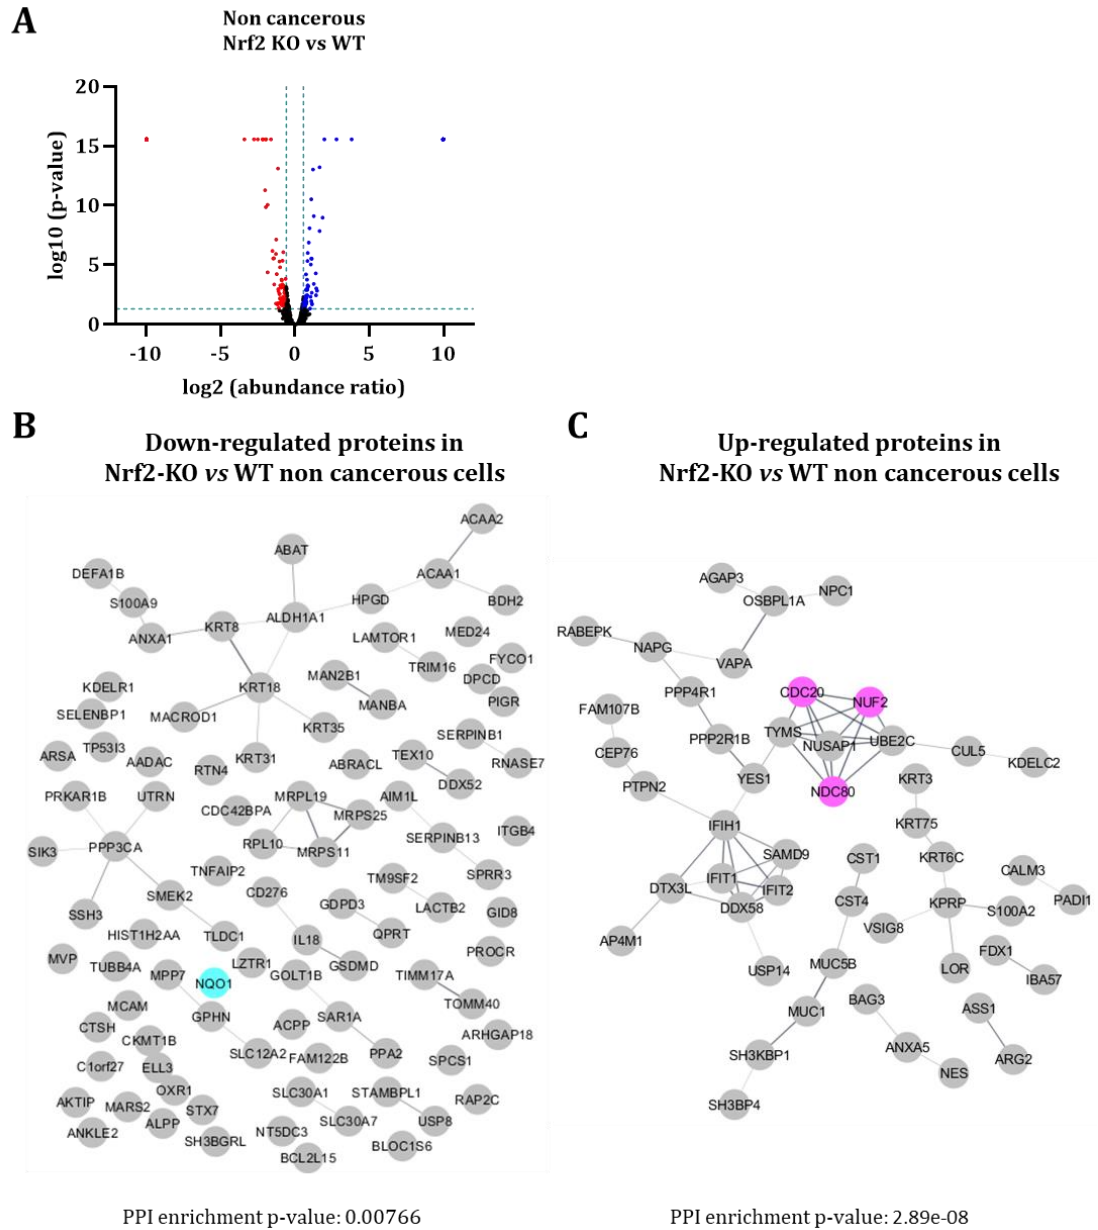

**Figure S3. Global proteomics analysis of the gastric non-cancerous cell line (HFE-145).** (A) Volcano plot showing p-values ( $-\log_{10}$ ) versus abundance ratio ( $\log_2$ ) in Nrf2-KO compared to WT cells. (B-C) STRING networks of (B) down-regulated proteins (p-value <0.05; abundance ratio <0.65) and (C) up-regulated proteins (p-value <0.05; abundance ratio >1.5). Blue nodes show proteins related to cellular redox homeostasis and pink nodes show proteins involved in cell cycle regulation. PPI: protein-protein interaction.

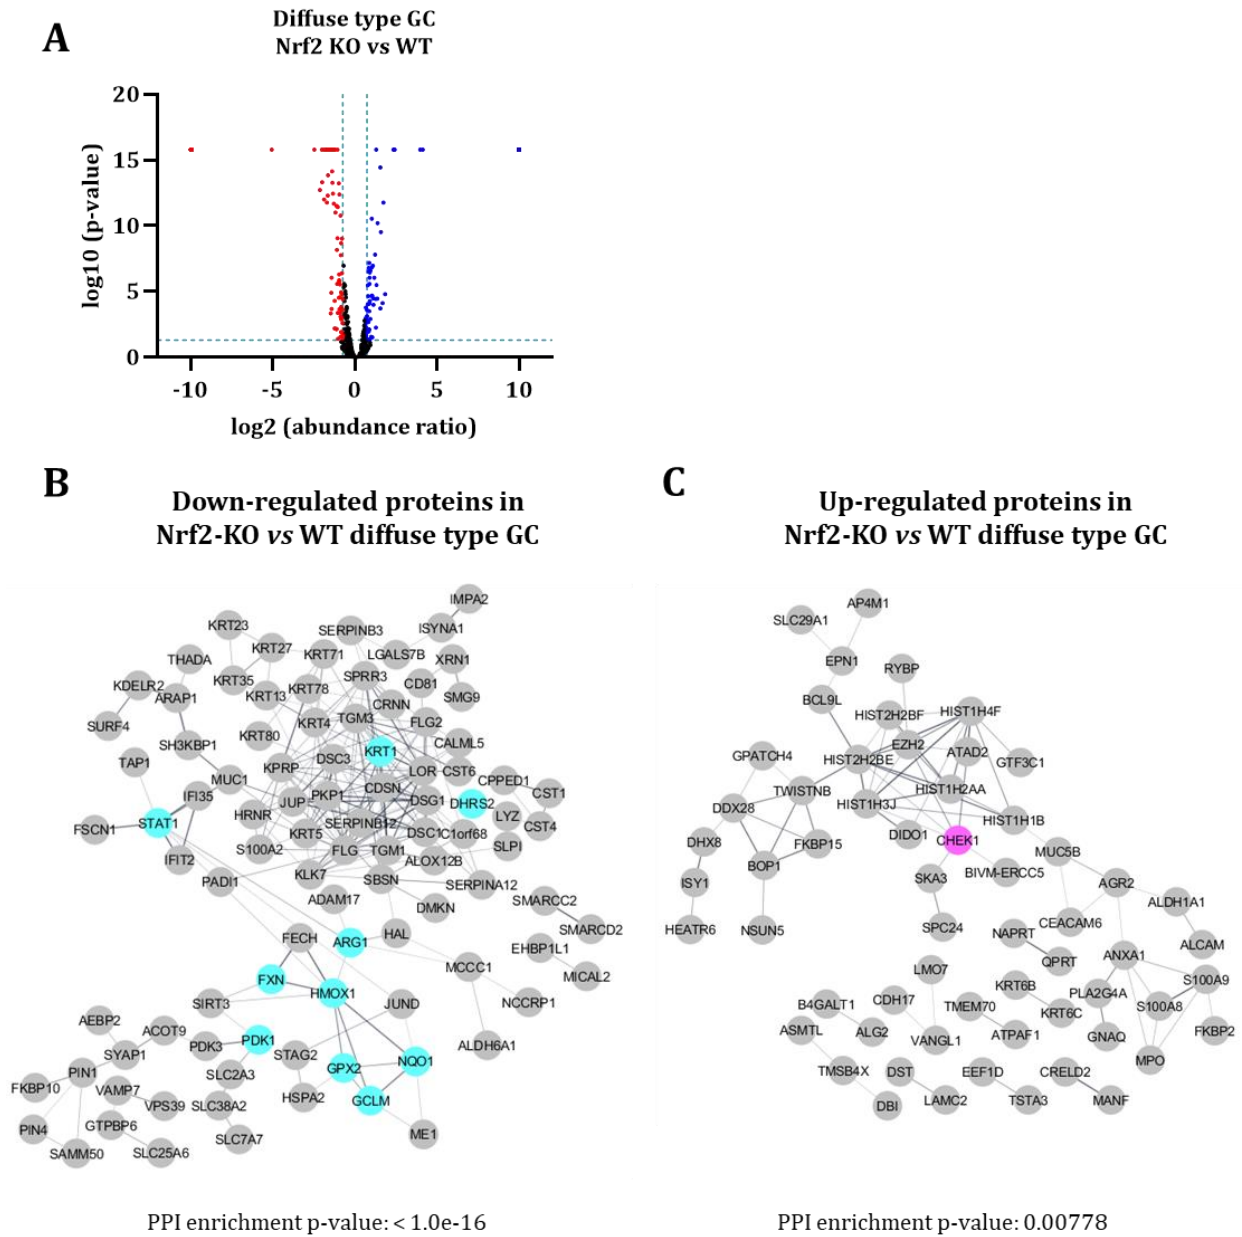

**Figure S4. Global proteomics analysis of the diffuse type gastric cancer cell line (AGS).** (A) Volcano plot showing p-values ( $-\log_{10}$ ) versus abundance ratio ( $\log_2$ ) in Nrf2-KO compared to WT cells. (B-C) STRING networks of (B) down-regulated proteins (p-value < 0.05; abundance ratio < 0.65) and (C) up-regulated proteins (p-value < 0.05; abundance ratio > 1.5). Blue nodes show proteins related to cellular redox homeostasis and pink nodes show proteins involved in cell cycle regulation. PPI: protein-protein interaction.

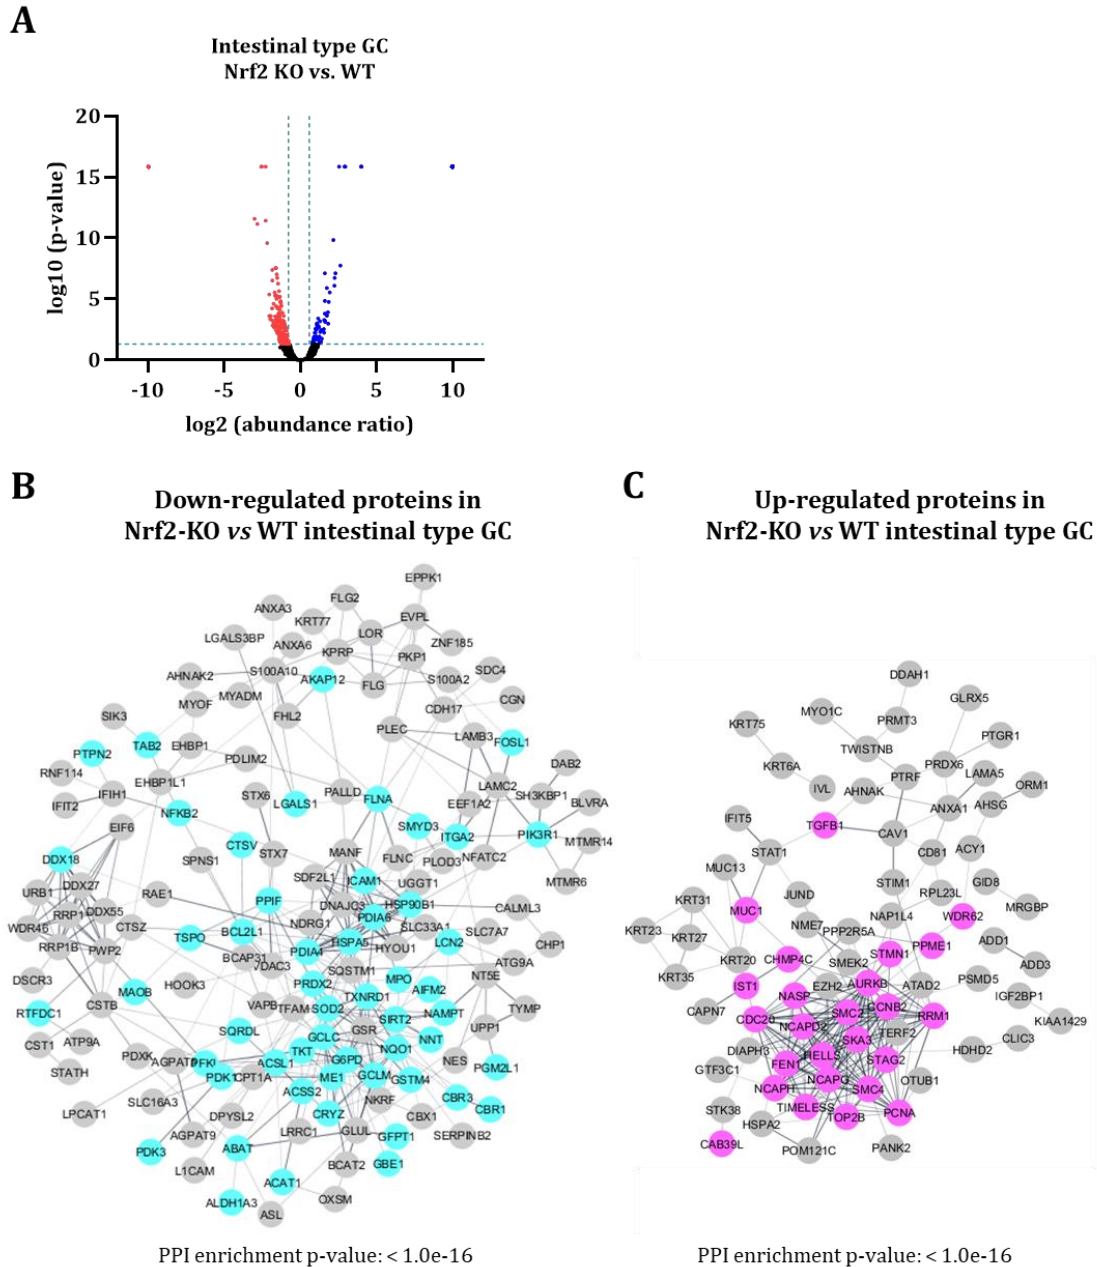

**Figure S5. Global proteomics analysis of the intestinal type gastric cancer cell line (MKN74).** (A) Volcano plot showing p-values ( $-\log_{10}$ ) versus abundance ratio ( $\log_2$ ) in Nrf2-KO compared to WT cells. (B-C) STRING networks of (B) down-regulated proteins (p-value < 0.05; abundance ratio < 0.65) and (C) up-regulated proteins (p-value < 0.05; abundance ratio > 1.5). Blue nodes show proteins related to cellular redox homeostasis and pink nodes show proteins involved in cell cycle regulation. PPI: protein-protein interaction.



**A**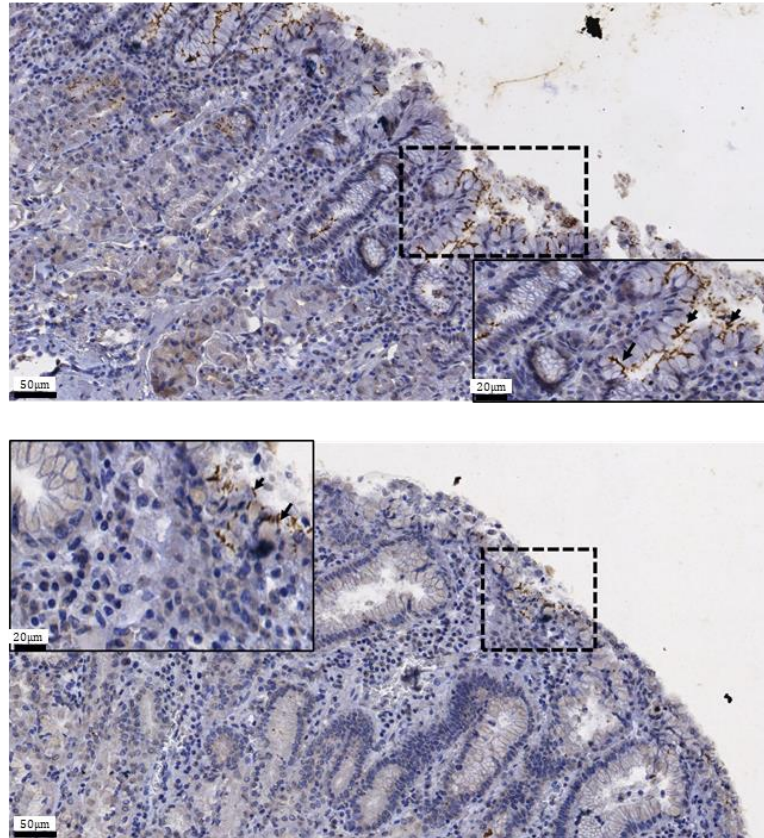**B**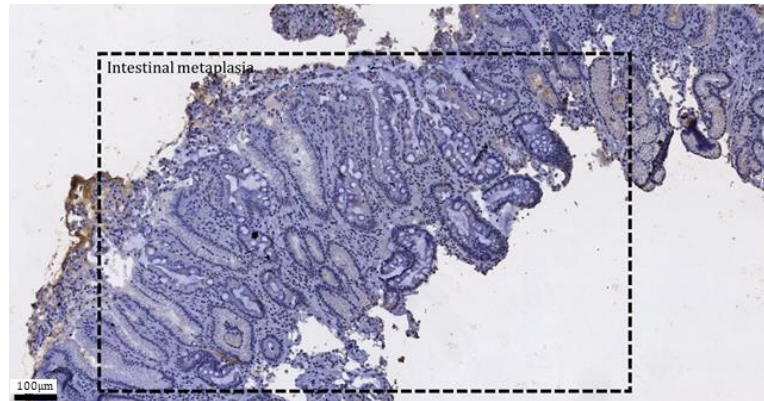

**Figure S6. Immunohistochemistry to detect *H. pylori* in infected human biopsies.** (A) The presence of the bacterium was detected in all infected-samples and depicted by the black arrows in the representative pictures. (B) Some *H. pylori*-infected tissues showed intestinal metaplasia area, characteristic of infection with this bacterium.

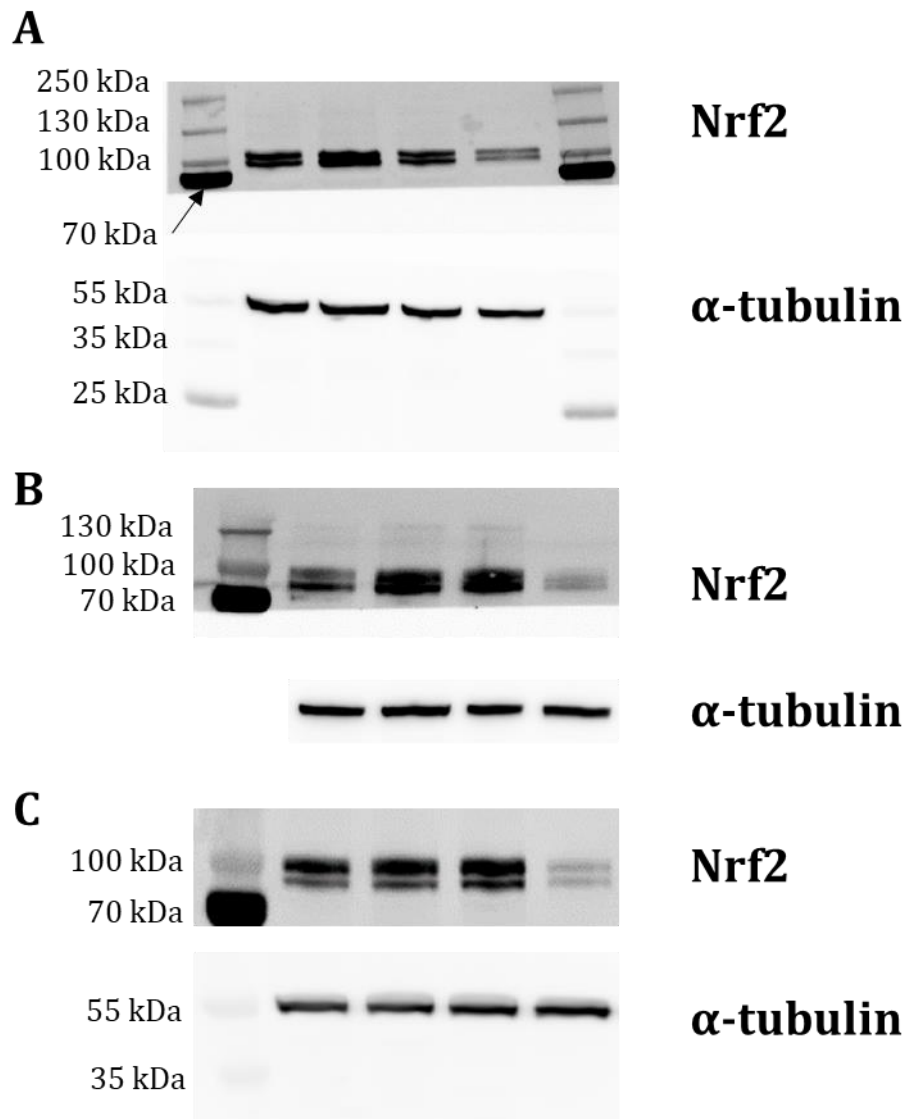

**Figure S7. Raw blot of the western-blot presented in Figure 1 (A) Non-cancerous HFE-145 cell line (B) Diffuse type GC AGS (C) Intestinal type GC MKN74.**

## File S1: SUPPLEMENTARY MATERIAL AND METHODS

### Differential proteomic analysis

#### Sample preparation and protein digestion

Protein samples were solubilized in Laemmli buffer and 2 µg per sample were deposited onto SDS-PAGE gel for concentration and cleaning purpose. Separation was stopped once proteins have entered resolving gel. After colloidal blue staining, bands were cut out from the SDS-PAGE gel and subsequently cut in 1 mm x 1 mm gel pieces. Gel pieces were destained in 25 mM ammonium bicarbonate 50% ACN, rinsed twice in ultrapure water and shrunk in ACN for 10 min. After ACN removal, gel pieces were dried at room temperature, covered with the trypsin solution (10 ng/µl in 50 mM NH<sub>4</sub>HCO<sub>3</sub>), rehydrated at 4 °C for 10 min, and finally incubated overnight at 37 °C. Spots were then incubated for 15 min in 50 mM NH<sub>4</sub>HCO<sub>3</sub> at room temperature with rotary shaking. The supernatant was collected, and an H<sub>2</sub>O/ACN/HCOOH (47.5:47.5:5) extraction solution was added onto gel slices for 15 min. The extraction step was repeated twice. Supernatants were pooled and dried in a vacuum centrifuge. Digests were finally solubilized in 0.1% HCOOH.

#### nLC-MS/MS analysis and Label-Free Quantitative Data Analysis

Peptide mixture was analyzed on a Ultimate 3000 nanoLC system (Dionex, Amsterdam, The Netherlands) coupled to a Electrospray Orbitrap Fusion™ Lumos™ Tribrid™ Mass Spectrometer (Thermo Fisher Scientific, San Jose, CA). Ten microliters of peptide digests were loaded onto a 300-µm-inner diameter x 5-mm C<sub>18</sub> PepMap™ trap column (LC Packings) at a flow rate of 10 µL/min. The peptides were eluted from the trap column onto an analytical 75-mm id x 50-cm C<sub>18</sub> Pep-Map column (LC Packings) with a 4–27.5% linear gradient of solvent B in 105 min (solvent A was 0.1% formic acid and solvent B was 0.1% formic acid in 80% ACN) followed by a 10 min gradient from 27.5% to 40% solvent B. The separation flow rate was set at 300 nL/min. The separation flow rate was set at 300 nL/min. The mass spectrometer operated in positive ion mode at a 2-kV needle voltage. Data were acquired using Xcalibur 4.4 software in a data-dependent mode. MS scans (*m/z* 375–1500) were recorded in the Orbitrap at a resolution of *R* = 120 000 (@ *m/z* 200) and an AGC target of 4 x 10<sup>5</sup> ions collected within 50 ms. Dynamic exclusion was set to 60 s and top speed fragmentation in HCD mode was performed over a 3 s cycle. MS/MS scans were collected in the Ion Trap with a maximum injection time of 35 ms. Only +2 to +7 charged ions were selected for fragmentation. Other settings were as follows: no sheath nor auxiliary gas flow, heated capillary temperature, 275 °C; normalized HCD collision energy of 30%, isolation width of 1.6 *m/z*, AGC target of 2 x 10<sup>3</sup> and normalized AGC target of 20%. Monoisotopic precursor selection (MIPS) was set to Peptide and an intensity threshold was set to 5 x 10<sup>3</sup>.

#### Database search and results processing

Data were searched by SEQUEST through Proteome Discoverer 2.4 (Thermo Fisher Scientific Inc.) against an *Homo sapiens* Reference Proteome Set protein database from Uniprot (20,324 entries; version 2020-05). Spectra from peptides higher than 5000 Da or lower than 350 Da were rejected. Search parameters were as follows: mass accuracy of the monoisotopic peptide precursor and peptide fragments was set to 10 ppm and 0.6 Da respectively. Only b- and y-ions were considered for mass calculation. Oxidation of methionines (+16 Da), methionine loss (-131 Da), methionine loss with acetylation (-89 Da) and protein N-terminal acetylation (+42 Da) were considered as variable modifications while carbamidomethylation of cysteines (+57 Da) was considered as fixed modification. Two missed trypsin cleavages were allowed. Peptide validation was performed using Percolator algorithm [1] and only “high confidence” peptides were retained corresponding to a 1% False Positive Rate at peptide level. Peaks were detected and integrated using the Minora algorithm embedded in Proteome Discoverer. Proteins were quantified based on unique peptide intensities. Normalization was performed based on human protein amount. Protein ratios were calculated as the median of all possible pairwise peptide ratios. A t-test was calculated based on background population of peptides or proteins. Quantitative data were considered for proteins quantified by a minimum of two peptides and a statistical p-value lower than 0.05.



1. Käll, L.; Canterbury, J.D.; Weston, J.; Noble, W.S.; MacCoss, M.J. Semi-Supervised Learning for Peptide Identification from Shotgun Proteomics Datasets. *Nat Methods* **2007**, *4*, 923–925, doi:10.1038/nmeth1113.
